# Supplementary material for: Detection of Bar Transgenic Sugarcane with a Rapid and Visual Loop-Mediated Isothermal Amplification Assay
Source: PubMed Central journal article supplement (PMC4782128; doi:10.3389/fpls.2016.00279), 2016-03-08
Supplement: DataSheet1.pdf [file DataSheet1.pdf]

## *Supplementary Material*

### **Detection of *bar* transgenic sugarcane with a rapid and visual loop-mediated isothermal amplification assay**

**Dinggang Zhou, Chunfeng Wang, Zhu Li, Yun Chen, Shiwu Gao, Jinlong Guo, Wenying Lu, Yachun Su, Liping Xu\*, Youxiong Que\***

Key Laboratory of Sugarcane Biology and Genetic Breeding, Fujian Agriculture and Forestry University, Ministry of Agriculture, Fuzhou, Fujian, China

**\*Correspondence:** Liping Xu and Youxiong Que, Key Laboratory of Sugarcane Biology and Genetic Breeding, Fujian Agriculture and Forestry University, Ministry of Agriculture, Fuzhou 350002, China. E-mail: [xlpmail@126.com](mailto:xlpmail@126.com), [queyouxiong@126.com](mailto:queyouxiong@126.com)

## 1. Supplementary Figures and Tables

### 1.1 Supplementary Figures

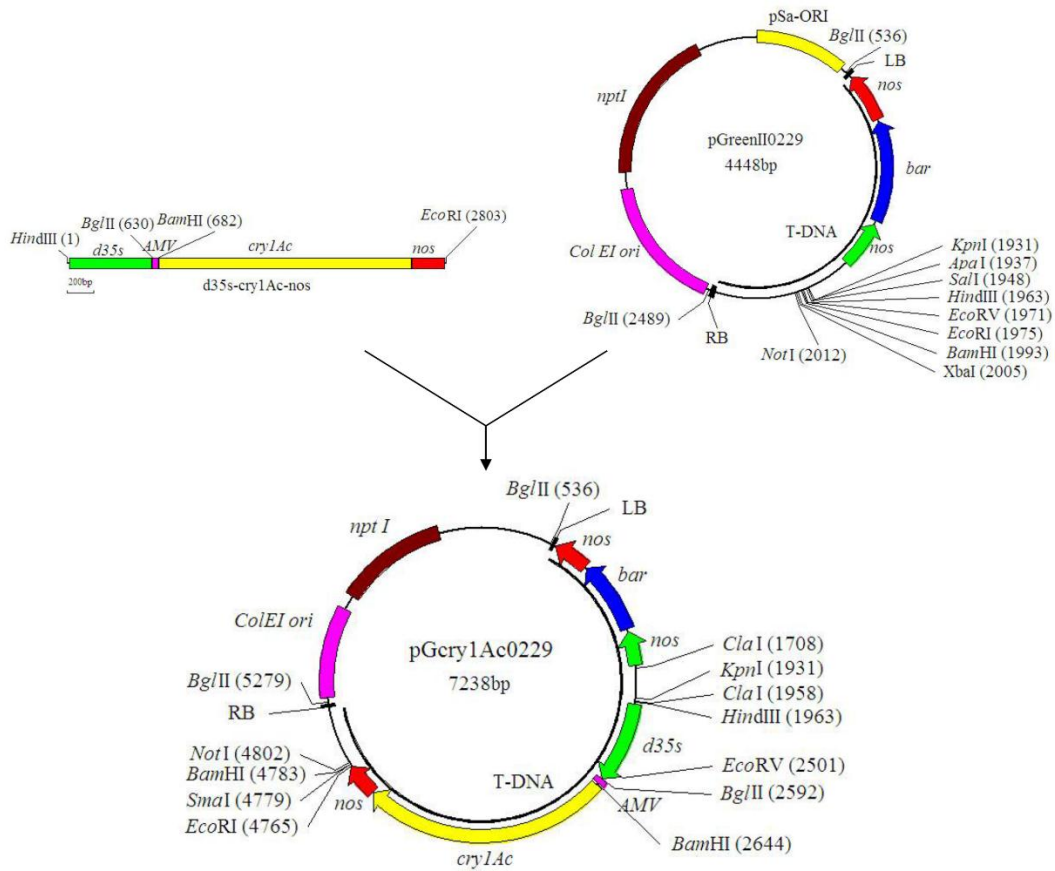

**Figure S1. Construction of the plasmid pGery1Ac0229 (1Ac0229).**

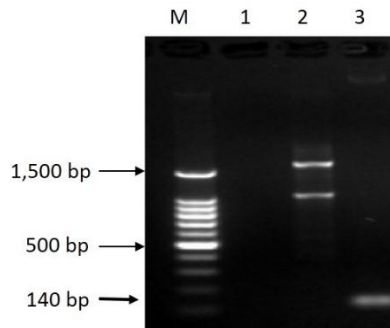

**Figure S2 Agarose gel electrophoresis of the plasmid 1Ac0229 PCR products.** Lane M: 100 bp DNA ladder. Lanes 1: ddH<sub>2</sub>O (blank control). Lanes 2: FN15 PCR products (negative control). Lanes 3: the plasmid 1Ac0229 PCR products.

```

1      TCAGATTTTCG GTGACGGGCA GGACCGGACG GGGCGGCACC GGCAGGCTGA AGTCCAGCTG
61     CCAGAAACCC ACGTCATGCC AGTTCF1cCCGTG CTTGAAGCCG GCCGF2CCGCA GCATGCCACG
121    GGGGGCF3ATAT CCGAGCGCCT CGTGCATGCG CACGCTCGGG TCGTTGGGCA GCCCGATGAC
181    AGCGACCACG CTCTTGAAGC CCTGTGCCTC CAGGGACTTC AGCAGGTGGGB1c TGTAGAGCGT
241    GGAGCCCAGT CCCGTCCGCT GGTGGCGGGG GGAGACGTAC ACGGTTGACT CGGCCGTCCA
301    GTCGTAGGCG TTGCGTGCCT TCCAGGGACC CGCGTAGGCG ATGCCGGCGA CCTCGCCGTC
361    CACCTCGGCG ACGAGCCAGG GATAGCGCTC CCGCAGACGG ACGAGGTCGT CCGTCCACTC
421    CTGCGGTTCC TCGGGCTCGG TACGGAAGTT GACCGTGCTT GTCTGGATGT AGTGGTTGAC
481    GATGGTGCAG ACCGCCGCA TGCCGCCTC GGTGGCACGG CGGATGTCGG CCGGGCGTCG
541    TTCTGGGCTC AT

```

**Figure S3. LAMP primers and their positions in *bar* gene (GenBank: EU048867.1) sequence.**

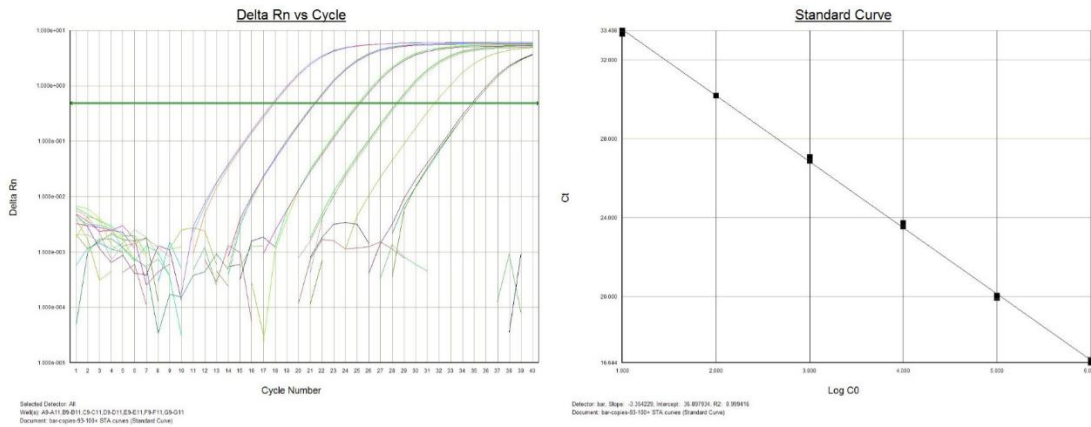

**Figure S4. The amplification curves and standard curves obtained by quantitative SYBR Green real-time PCR with the primer pair of *bar* gene. In the performed quantitative SYBR Green real-time PCR assays, the standard curve formula is  $y = -3.354x + 36.898$ , coefficient of determination ( $R^2 = 0.999$ ) and amplification efficiency ( $E = 0.99$ ).**

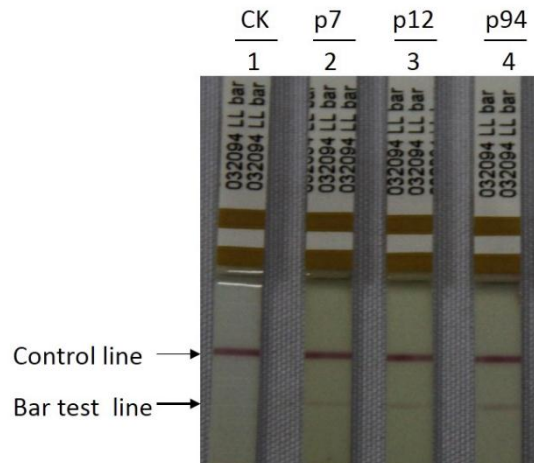

**Figure S5. Bar protein expression in putative *bar* transgenic sugarcane by quick test strip kit detection.**

## 1.2 Supplementary Tables

**Table S1. The sequence information of LAMP primers used in this experiment.**

| <b>Primer</b> | <b>Position</b>    | <b>Primer sequences (5'- 3')</b>          |
|---------------|--------------------|-------------------------------------------|
| F3            | 61-79              | CCAGAAACCCACGTCATGC                       |
| B3            | 224-241            | CACGCTCTACACCCACCT                        |
| FIP (F1c+F2)  | 127-145<br>86-101  | GCACGAGGCGCTCGGATAT-<br>CCGTGCTTGAAGCCGG  |
| BIP (B1c+B2)  | 162-180<br>205-222 | CGTTGGGCAGCCCGATGAC-<br>CTGAAGTCCCTGGAGCA |
| LF            | 106-120            | CGTGGCATGCTGCGG                           |
| LB            | 183-200            | CGACCACGCTCTTGAAGC                        |

**Table S2. Estimation of copy number of *bar* gene in transgenic sugarcane by quantitative SYBR Green real-time PCR.**

| Lines | Copy number of <i>bar</i> in single cell (Mean ± St) | Lines | Copy number of <i>bar</i> in single cell (Mean ± St) | Lines    | Copy number of <i>bar</i> in single cell (Mean ± St) |
|-------|------------------------------------------------------|-------|------------------------------------------------------|----------|------------------------------------------------------|
| p1    | 1.82±0.04                                            | p35   | 7.39±0.54                                            | p69      | 6.99±0.25                                            |
| p2    | 1.15±0.02                                            | p36   | 7.25±0.57                                            | p70      | 6.49±0.15                                            |
| p3    | 1.94±0.02                                            | p37   | 4.82±0.12                                            | p71      | 7.47±0.17                                            |
| p4    | 3.41±0.11                                            | p38   | 7.13±0.09                                            | p72      | 5.99±0.11                                            |
| p5    | 4.16±0.09                                            | p39   | 5.86±0.09                                            | p73      | 8.23±0.17                                            |
| p6    | 2.82±0.07                                            | p40   | 8.25±0.19                                            | p74      | 7.33±0.33                                            |
| p7    | 0.35±0.00                                            | p41   | 7.20±0.10                                            | p75      | 7.98±0.03                                            |
| p8    | 1.83±0.06                                            | p42   | 8.47±0.77                                            | p76      | 8.04±0.20                                            |
| p9    | 1.57±0.04                                            | p43   | 7.37±0.51                                            | p77      | 9.07±0.12                                            |
| p10   | 1.49±0.01                                            | p44   | 8.94±0.75                                            | p78      | 5.50±0.09                                            |
| p11   | 0.56±0.00                                            | p45   | 7.77±0.16                                            | p79      | 14.15±0.17                                           |
| p12   | 0.20±0.00                                            | p46   | 8.90±0.11                                            | p80      | 11.81±0.15                                           |
| p13   | 5.89±0.08                                            | p47   | 6.63±0.20                                            | p81      | 13.18±0.04                                           |
| p14   | 1.29±0.12                                            | p48   | 6.06±0.02                                            | p82      | 18.54±0.11                                           |
| p15   | 1.34±0.02                                            | p49   | 8.34±0.17                                            | p83      | 13.67±0.50                                           |
| p16   | 1.90±0.01                                            | p50   | 9.24±0.17                                            | p84      | 16.72±0.55                                           |
| p17   | 0.71±0.03                                            | p51   | 6.98±0.16                                            | p85      | 11.83±0.11                                           |
| p18   | 0.83±0.06                                            | p52   | 6.76±0.25                                            | p86      | 11.17±0.05                                           |
| p19   | 8.75±0.36                                            | p53   | 10.08±0.22                                           | p87      | 13.08±0.25                                           |
| p20   | 0.65±0.01                                            | p54   | 9.01±0.12                                            | p88      | 11.62±0.10                                           |
| p21   | 4.30±0.08                                            | p55   | 5.49±0.11                                            | p89      | 8.58±0.42                                            |
| p22   | 3.60±0.05                                            | p56   | 6.22±0.28                                            | p90      | 11.44±0.28                                           |
| p23   | 4.09±0.08                                            | p57   | 7.57±0.23                                            | p91      | 13.84±0.50                                           |
| p24   | 3.91±0.07                                            | p58   | 7.74±0.40                                            | p92      | 16.90±0.39                                           |
| p25   | 7.88±0.25                                            | p59   | 9.78±0.29                                            | p93      | 17.31±0.81                                           |
| p26   | 4.72±0.36                                            | p60   | 8.89±0.51                                            | p94      | 0.53±0.01                                            |
| p27   | 4.40±0.13                                            | p61   | 9.41±0.85                                            | p95      | 17.01±0.75                                           |
| p28   | 3.52±0.13                                            | p62   | 9.94±0.17                                            | p96      | 17.91±0.28                                           |
| p29   | 3.35±0.03                                            | p63   | 7.17±0.12                                            | p97      | 16.36±0.73                                           |
| p30   | 2.74±0.07                                            | p64   | 9.51±0.34                                            | p98      | 12.38±0.20                                           |
| p31   | 4.41±0.17                                            | p65   | 10.29±0.33                                           | p99      | 14.27±0.64                                           |
| p32   | 10.33±0.13                                           | p66   | 8.45±0.48                                            | p100     | 13.70±0.12                                           |
| p33   | 11.52±0.18                                           | p67   | 7.10±0.46                                            | FN15(CK) | 0.02±0.00                                            |
| p34   | 9.68±0.40                                            | p68   | 5.51±0.17                                            |          |                                                      |
